# Supplementary material for: Targeting PRMT5 Activity Inhibits the Malignancy of Hepatocellular Carcinoma by Promoting the Transcription of HNF4α
Source: PubMed Central journal article supplement — Theranostics. 2019 Apr 13;9(9):2606–17. doi: 10.7150/thno.32344 (PMC6525986; doi:10.7150/thno.32344), 2019-04-13
Supplement: thnov09p2606s1.pdf [file thnov09p2606s1.pdf]

**Figure S1**

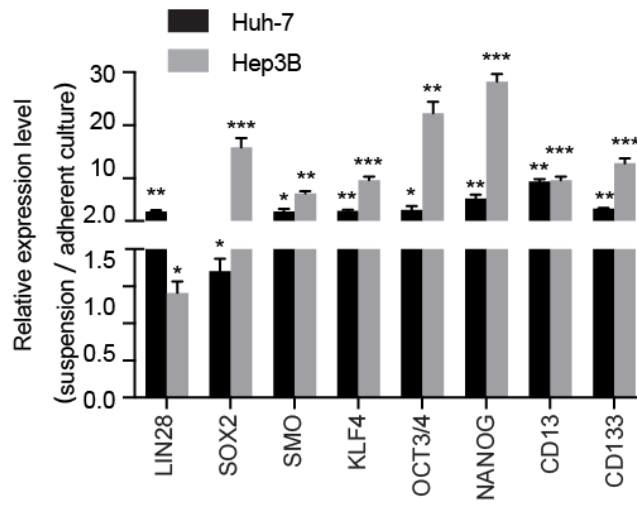

**Figure S1. Liver cancer stem cells (LCSCs) were enriched by spheroid formation assay.**

Real-time PCR analysis of the expression of stemness markers, including LIN28, SOX2, SMO, OCT3/4, KLF4, NANOG and CD13, and LCSC marker CD133. The fold changes of mRNA expression represented tumor spheres versus the adherent Hep3B cells. The mRNA expression levels were normalized against  $\beta$ -actin. The data are presented as the mean  $\pm$  SD. \*  $P < 0.05$ , \*\*  $P < 0.01$ , \*\*\*  $P < 0.001$ .

**Figure S2**

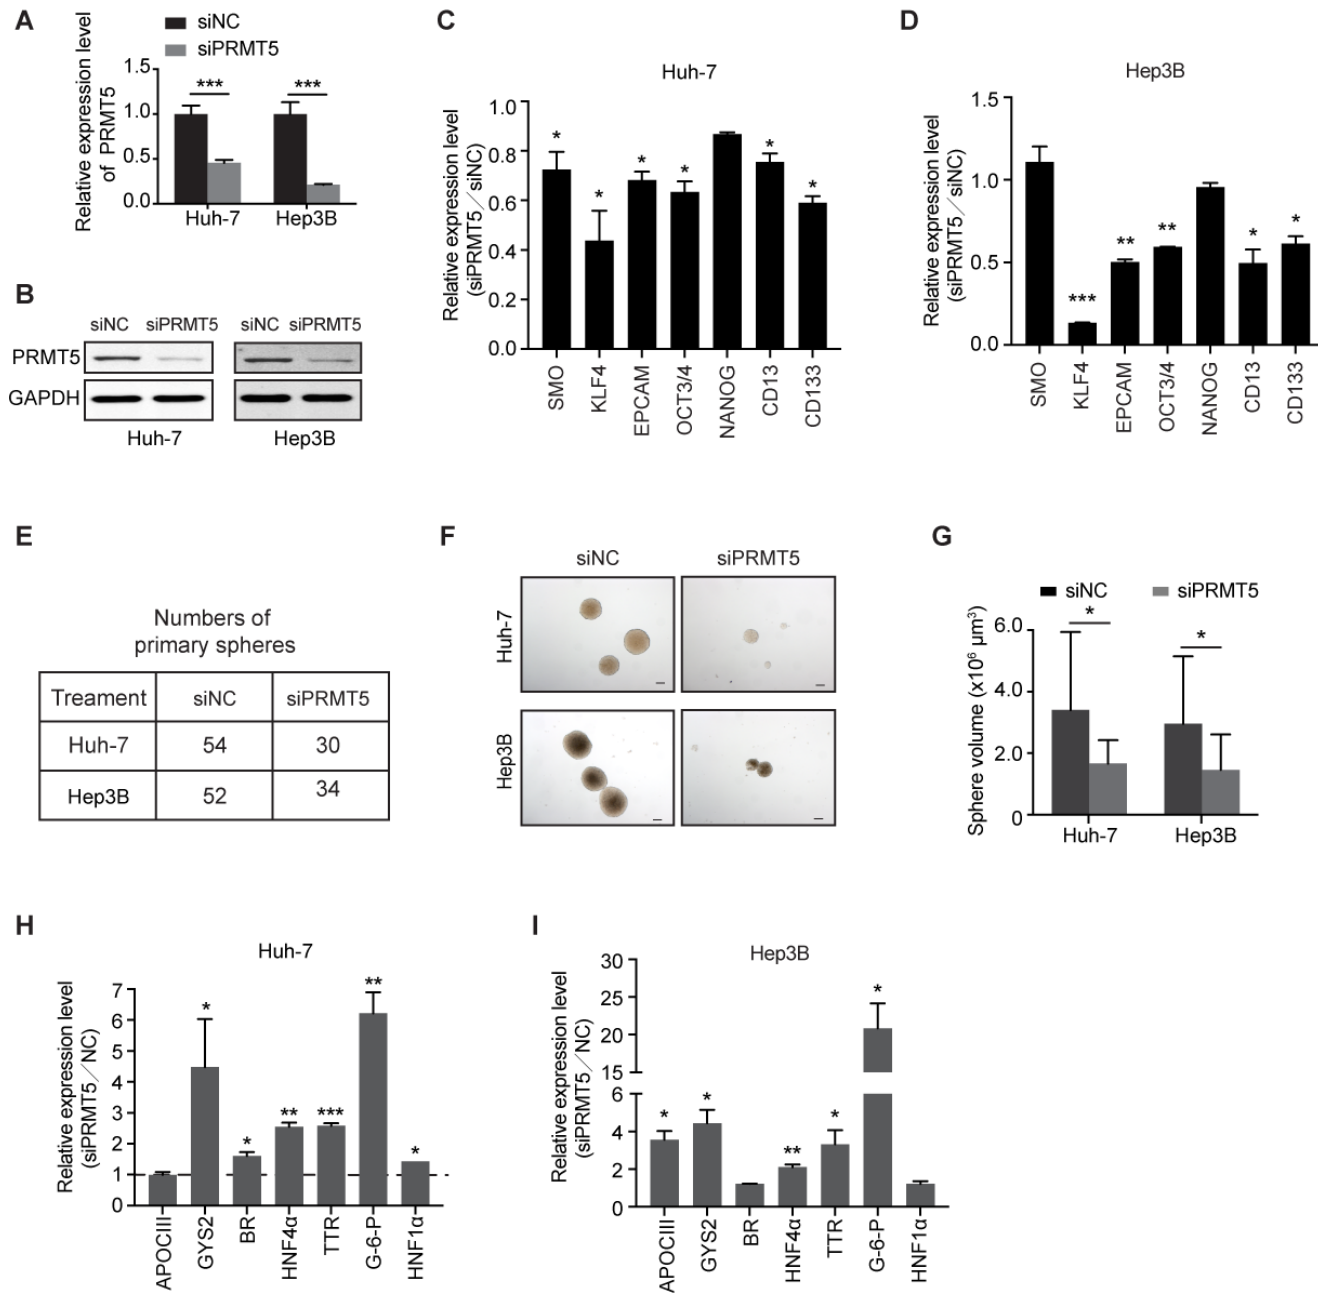

**Figure S2. Knockdown of PRMT5 downregulates the expression of stemness markers and upregulates the expression of characteristic hepatocyte markers.**

(A, B) Huh-7 and Hep3B cells were transfected with control siNC and siPRMT5. The expression of PRMT5 was evaluated by real-time PCR and western blotting analysis. (C, D) The expression of cancer stemness markers in Huh-7 (C) and Hep3B (D) cells was detected by

real-time PCR. (E) Huh-7 and Hep3B cells transfected with control siNC and siPRMT5 were assessed for spheroid formation assay. The frequency of primary spheres was showed. (F) Representative photographs of tumor spheres of siNC and siPRMT5 in HCC cells. Scale bars = 100  $\mu$ m. (G) Quantification analysis of the size of tumor spheres formed from siNC and siPRMT5. (H, I) The expression of liver specific genes in Huh-7 (H) and Hep3B (I) cells was detected by real-time PCR. The data are presented as the mean  $\pm$  SD. \*  $P < 0.05$ , \*\*  $P < 0.01$ , \*\*\*  $P < 0.001$ .

**Figure S3**

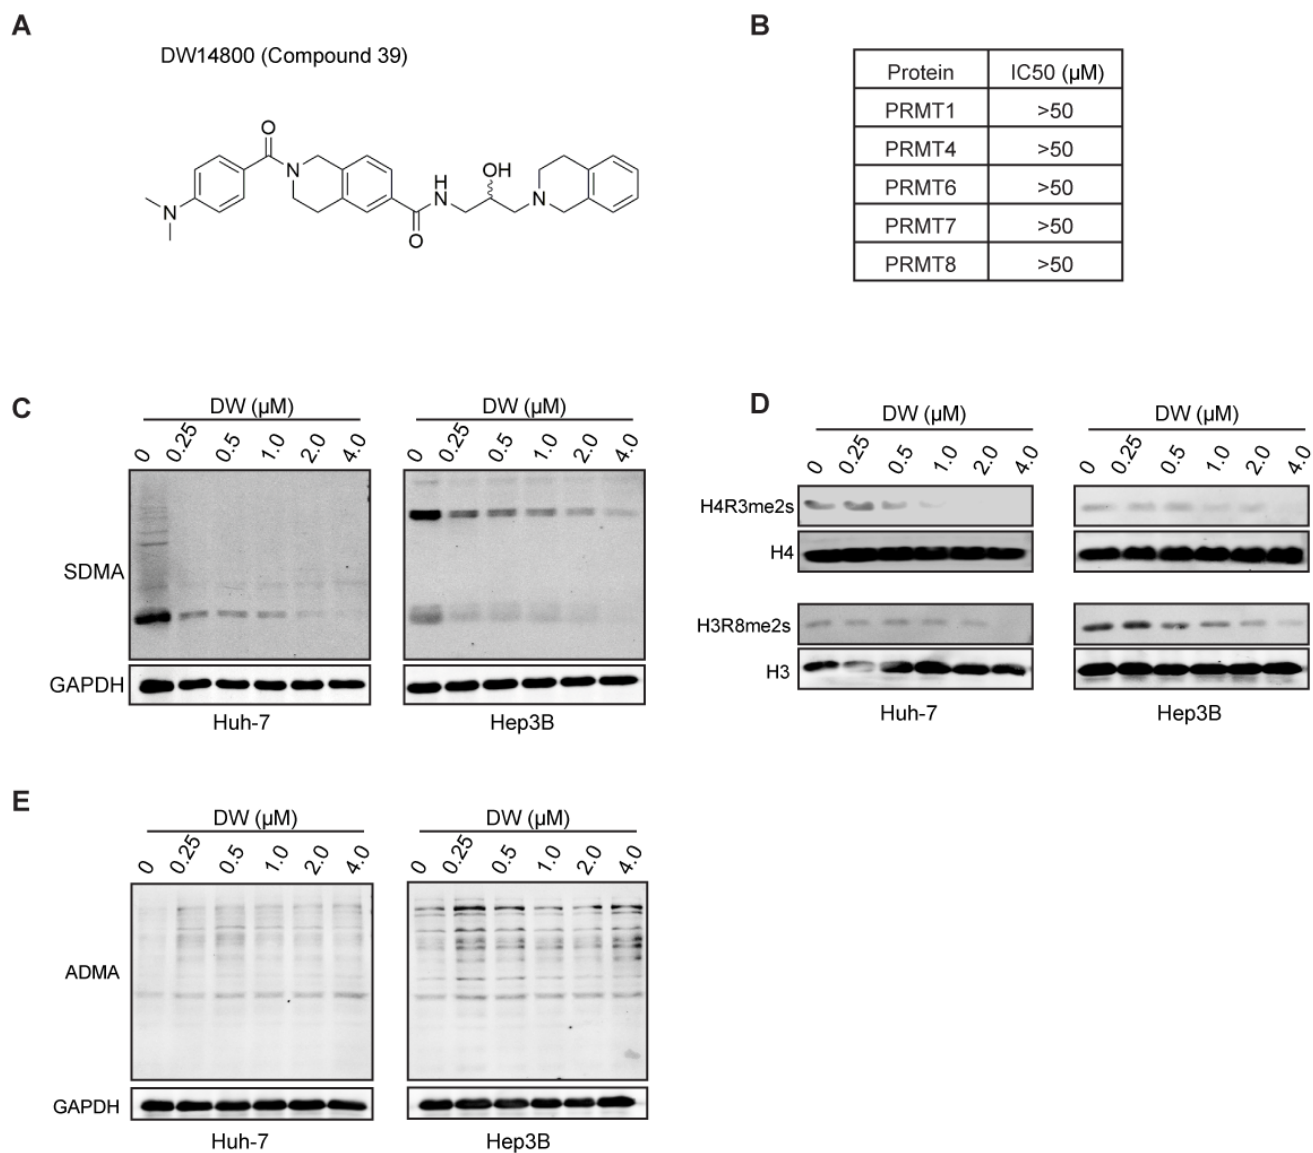

**Figure S3. The novel PRMT5 inhibitor DW14800 selectively reduced the cellular symmetric dimethylarginine.**

(A) Structure of DW14800. (B) Selectivity profile of DW14800. DW14800 showed no activity against the other PRMT enzymes at a 50  $\mu\text{M}$  concentration. (C) The effects of DW14800 on symmetric dimethylarginine (SDMA) in Huh-7 and Hep3B cells. (D) The effects of DW14800 on symmetric dimethylation of histone H4 on arginine 3 (H4R3me2s) and histone H3 on arginine 8 (H3R8me2s) in Huh-7 and Hep3B cells. (E) Effects of

DW14800 on asymmetric dimethylarginine (ADMA) in Huh-7 and Hep3B cells were detected by antibody against Asymmetric Di-Methyl Arginine Motif.

**Figure S4**

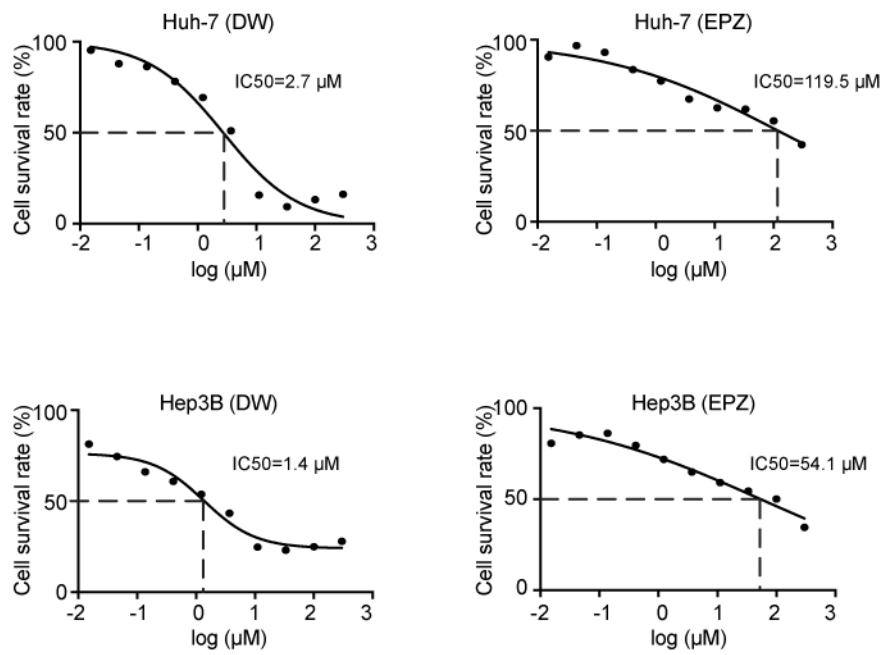

**Figure S4. The  $\text{IC}_{50}$  values of DW14800 were dramatically lower than EPZ015666.**

HCC cells were treated with DW14800 or the reported inhibitor EPZ015666 for 3 days. The viability of the cells was detected with CCK8.

**Figure S5**

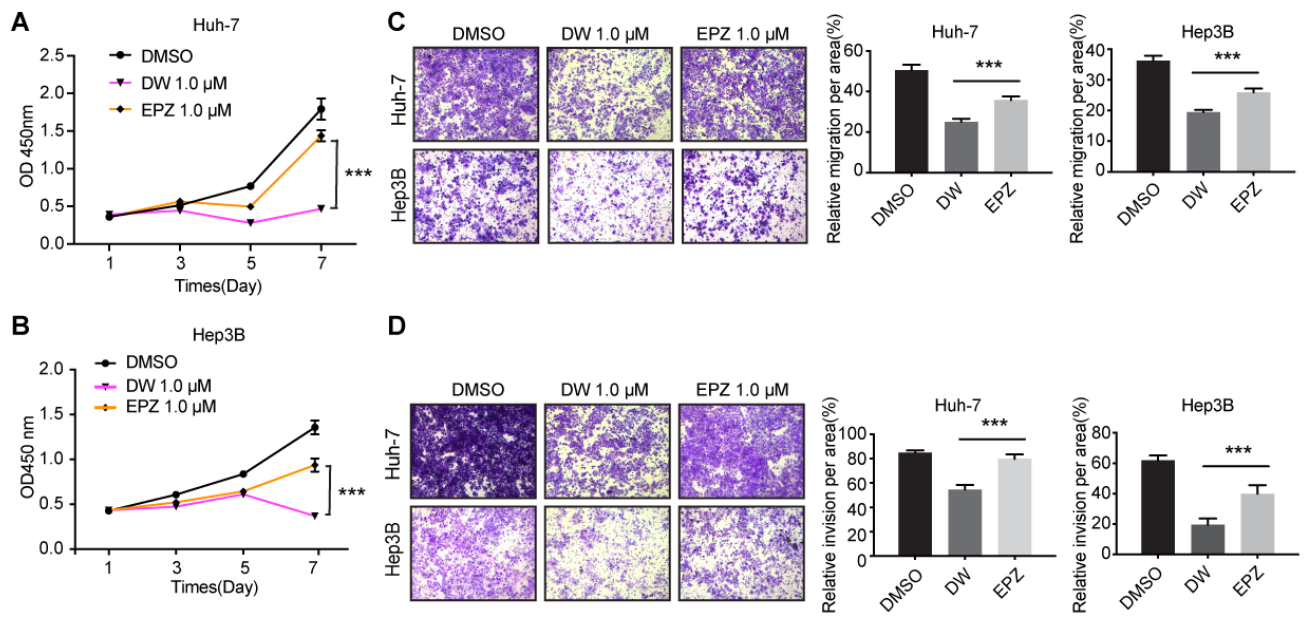

**Figure S5. The effects of DW14800 and EPZ015666 on HCC malignancy.**

Huh-7 and Hep3B cells were treated with DW14800 and EPZ015666 at indicated concentration and the cell proliferation (A, B), migration (C) and invasion (D) were examined. The data are presented as the mean  $\pm$  SD. \*\*\*  $P < 0.001$ .

**Figure S6**

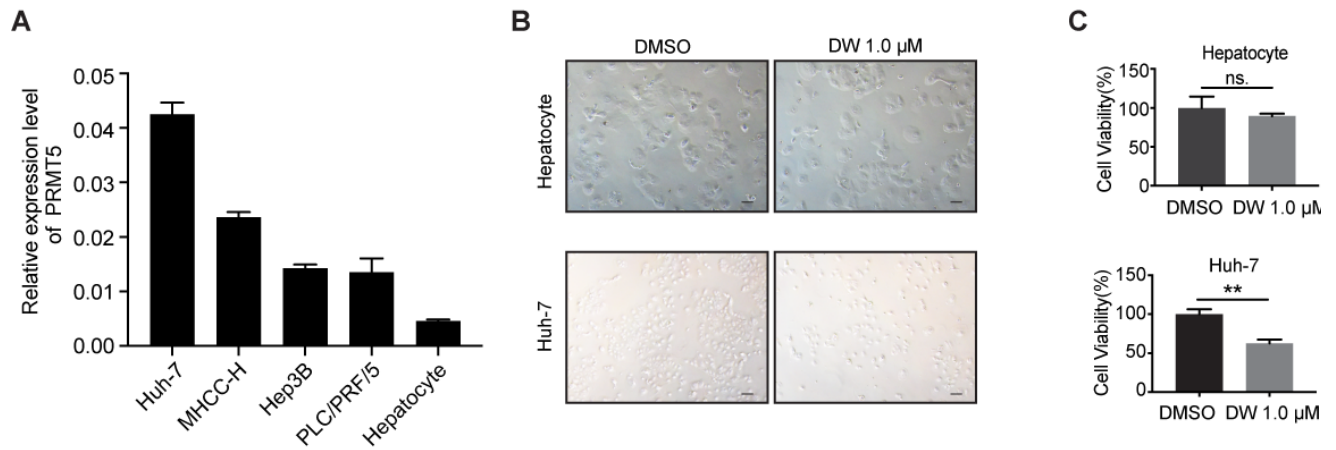

**Figure S6. Cytotoxic effect of DW14800 on primary human hepatocytes and Huh-7 cells.**

(A) The relative expression levels of PRMT5 in representative HCC cell lines and primary

human hepatocytes. (B) The morphology of primary human hepatocytes and Huh-7 cells

treated with DW14800 for 5 days. Scale bars = 100  $\mu$ m. (C) The cell viability was measured

by CCK8 assay. The data are presented as the mean  $\pm$  SD. \*\*  $P < 0.01$ , ns, no statistical

significance.



**Table S1. PCR primers used in this study**

| <b>Genes</b> | <b>Forward primer (5'- 3')</b> | <b>Reverse primer (5'- 3')</b> |
|--------------|--------------------------------|--------------------------------|
| β-actin      | CATCCTGCGTCTGGACCT             | GTA CT TGC GCTCAGGAGGAG        |
| LIN28        | TGTAAGTGGTTCAACGTGCG           | CCTCACCTCCTTCAAGCTC            |
| CD133        | CATCTCTCAATGACCCTCTGTG         | CCTCAGTTCAGGGTTGCTATT          |
| CD13         | GTTCTCCTTCTCCAACCTCATC         | CTGTTTCCTCGTTGTCCTTCT          |
| SOX2         | GCGAACCATCTCTGTGGTCT           | GGAAAGTTGGGATCGAACAA           |
| SMO          | ATCTCCACAGGAGAGACTGGTTCGG      | AAAGTGGGGCCTTGGGAACATG         |
| KLF4         | GCGGCAAAACCTACACAAAG           | CCCCGTGTGTTTACGGTAGT           |
| OCT3/4       | CGACCATCTGCCGCTTTGAG           | CCCCCTGTCCCCATTCTTA            |
| NANOG        | GATTTGTGGGCCTGAAGAAA           | TTGGGACTGGTGAAGAATC            |
| PRMT1        | CAGGCGGAAAGCAGTGAGAA           | TGGAGTTGCGGTAAGTGAGG           |
| PRMT5        | TTGCCGGCTACTTTGAGACT           | ACAGATGGTTTGGCCTTCAC           |
| EHMT2        | GGAGGAAGAGGAGGAAGAAGAA         | CCACTGGAACCACTCCTATCT          |
| SETD8        | CATGAAGTCCGAGGAACAGAAG         | GAATCACAAGATGAGGGTGGAG         |
| DNMT1        | CGGCCTCATCGAGAAGAATATC         | AAGCCAGTGATCCACCATTC           |
| DNMT3B       | GATGAAGATCAGAGCCGAGAAC         | TCAAAGAGAGGGTGGAAAGGA          |
| HNF4α        | CTTCCTTCTTCATGCCAG             | ACACGTCCCCATCTGAAG             |
| APOCIII      | GGGTACTCCTTGTTGTTGC            | AAATCCCAGAACTCAGAGAAC          |
| GYS2         | CCAGTGGGAAGTCGAAGAAC           | TTCTCTCCCCATTCATCTGC           |
| BR           | ACAAGGTGCTGCGGGAATCA           | ACTGGTGGGAGGGGTAGGTG           |
| TTR          | TCAGAAAGGCTGCTGATGAC           | AGTCGTTGGCTGTGAATACC           |
| ALDOB        | AGGAGGACTCTTCTCTCCCAA          | GATTCATCTGCAGCCAGGAT           |
| G-6-P        | GGCTCCATGACTGTGGGATC           | TTCAGCTGCACAGCCCAGAA           |
| HNF1α        | TGATGAGCTACCAACCAAGAAG         | TAGGGTTCTTCTGCCTCTCATA         |

**Table S2. PCR primers for ChIP used in this study**

---

|                   |                          |                         |
|-------------------|--------------------------|-------------------------|
| HNF4 $\alpha$ -a  | CCGTTAAGCAATGTGGAAC      | GAAGAGATGTGGAGGGCAG     |
| HNF4 $\alpha$ -b  | GTATTTGGTCTCTTTCAGC      | TTATTTACATCGTCTCTTC     |
| HNF4 $\alpha$ -c  | AGGCAATGAGGGCTGGAGG      | AGAGTGGGCTTTGTGGGGG     |
| HNF4 $\alpha$ -d  | ATGCCATCTCATTTCCTTC      | TTTTCCCATCACATTCTCC     |
| HNF4 $\alpha$ -nc | TGCACAGTAGGTGTGATGCTGA   | AACCATGTGACCGTGTTTCAGTC |
| eIF4E             | TGGTAGAATCTCAAATAGGCAAAG | ACAGAGTTTCAGGAAAATCTCCA |

---
